# Supplementary material
Source: PubMed Central journal article supplement (PMC4291386)
Supplement: AAC.03783-14_zac001153538so1.pdf [file AAC.03783-14_zac001153538so1.pdf]

**Figure S1.** PFGE analysis of isolates from Patients 1 and 2 throughout the hospital stay.

**Isolates from Burn Patient 1 – PFGE Type 50**

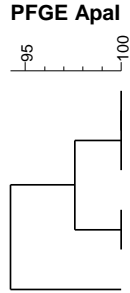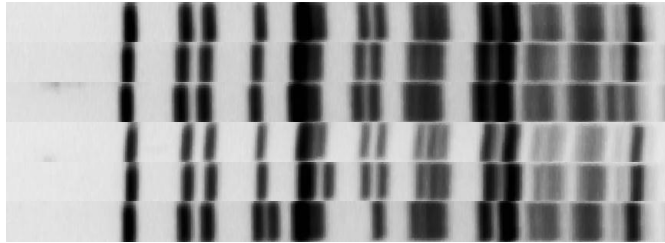

| Phoenix ID           | Source            | Hospital day | Day of colistin treatment | Colistin MIC* (µg/mL) |
|----------------------|-------------------|--------------|---------------------------|-----------------------|
| <i>Acinetobacter</i> | BAL               | 36           | 21                        | 1.0                   |
| <i>Acinetobacter</i> | BAL               | 30           | 15                        | 0.75                  |
| <i>Acinetobacter</i> | sputum            | 70           | Post                      | 1.0                   |
| <i>Acinetobacter</i> | tracheal aspirate | 12**         | Pre                       | 0.75                  |
| <i>Acinetobacter</i> | BAL               | 30           | 15                        | 0.75                  |
| <i>Acinetobacter</i> | BAL               | 36           | 21                        | 1.0                   |

**Isolates from Burn Patient 2 – PFGE Type 49**

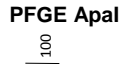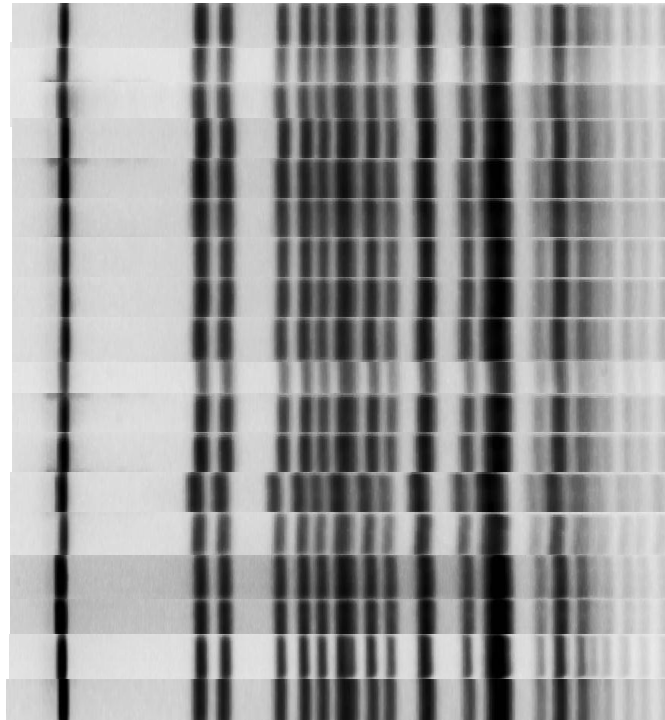

| Phoenix ID           | Source              | Hospital day | Day of colistin treatment | Colistin MIC* (µg/mL) |
|----------------------|---------------------|--------------|---------------------------|-----------------------|
| <i>Acinetobacter</i> | groin               | 1            | Pre                       | 0.5                   |
| <i>Acinetobacter</i> | wound (superficial) | 2            | Pre                       | 0.5                   |
| <i>Acinetobacter</i> | wound (superficial) | 2            | Pre                       | 0.75                  |
| <i>Acinetobacter</i> | tracheal aspirate   | 2            | Pre                       | 0.75                  |
| <i>Acinetobacter</i> | wound (deep)        | 2**          | Pre                       | 0.75                  |
| <i>Acinetobacter</i> | wound (superficial) | 5            | 1                         | 0.75                  |
| <i>Acinetobacter</i> | BAL                 | 5            | 1                         | 0.5                   |
| <i>Acinetobacter</i> | wound (deep)        | 10           | 6                         | 0.5                   |
| <i>Acinetobacter</i> | wound (deep)        | 10           | 6                         | 0.75                  |
| <i>Acinetobacter</i> | wound (superficial) | 11           | 7                         | 0.75                  |
| <i>Acinetobacter</i> | wound (superficial) | 11           | 7                         | 0.75                  |
| <i>Acinetobacter</i> | wound (superficial) | 12           | 8                         | 1.0                   |
| <i>Acinetobacter</i> | urine               | 24           | Post                      | 1.5                   |
| <i>Acinetobacter</i> | synovial fluid      | 26           | Post                      | 0.75                  |
| <i>Acinetobacter</i> | tracheal aspirate   | 38           | Post                      | 0.75                  |
| <i>Acinetobacter</i> | BAL                 | 47           | Post                      | 24                    |
| <i>Acinetobacter</i> | BAL                 | 52           | Post                      | 1.0                   |
| <i>Acinetobacter</i> | rectal swab         | 101          | Post                      | >256                  |

\* E-Test™, Bio-Merieux

\*\* First infecting isolate
